# Supplementary material for: Biomimetic Electrospun Self-Assembling Peptide Scaffolds for Neural Stem Cell Transplantation in Neural Tissue Engineering
Source: MDPI journal article supplement (doi:10.3390/pharmaceutics15092261), 2023-08-31

# Biomimetic Electrospun Self-Assembling Peptide Scaffolds for Neural Stem Cell Transplantation in Neural Tissue Engineering

Mahdi Forouharshad<sup>1</sup>, Andrea Raspa<sup>1,2</sup>, Amanda Marchini<sup>1</sup>, Maria Gessica Ciulla<sup>1</sup>,

Alice Magnoni<sup>3</sup>, Fabrizio Gelain<sup>1,2,\*</sup>

<sup>1</sup>Institute for Stem-Cell Biology, Regenerative Medicine and Innovative Therapies, IRCCS Casa Sollievo della Sofferenza, 71013 San Giovanni Rotondo, Italy

<sup>2</sup>Center for Nanomedicine and Tissue Engineering (CNTE), ASST Grande Ospedale Metropolitano Niguarda, 20162 Milan, Italy

<sup>3</sup>Department of Biotechnology and Biosciences, University of Milan – Bicocca, Piazza della Scienza 2, 20125 Milan, Italy.

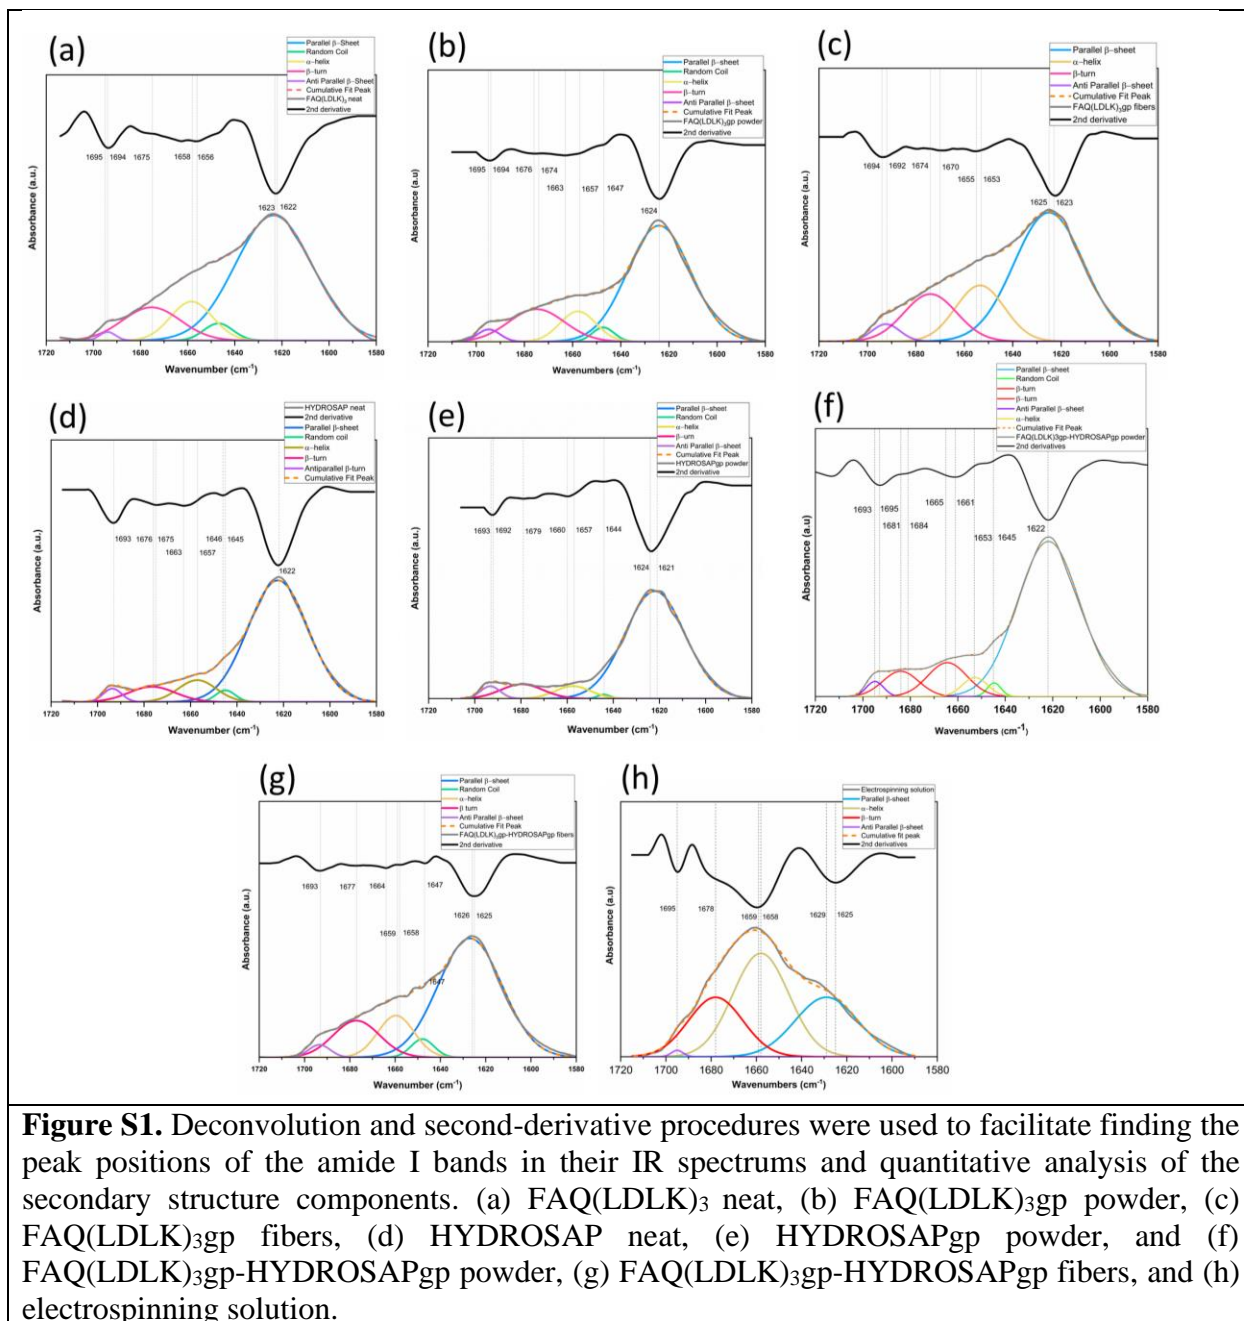

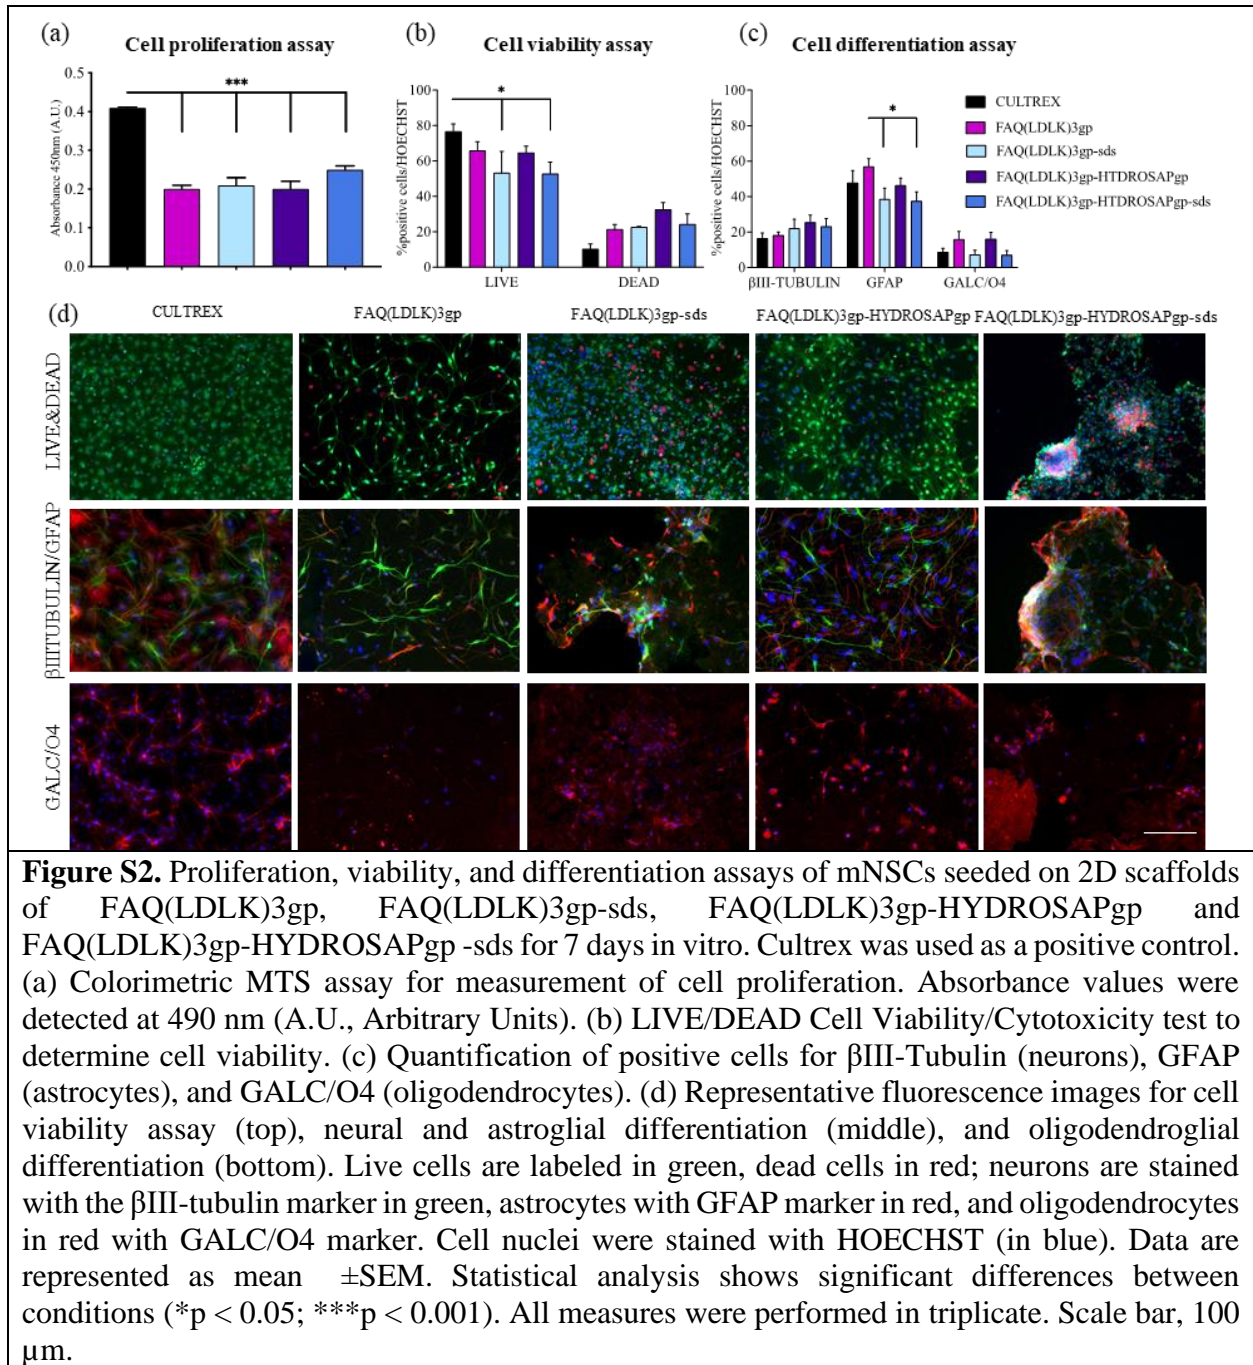

Supplement: s1 [file s1]
